# Persistent Catechol-O-methyltransferase–dependent Pain Is Initiated by Peripheral $\beta$ -Adrenergic Receptors

Brittney P. Ciszek, B.Sc., Sandra C. O'Buckley, B.Sc., Andrea G. Nackley, Ph.D.

## ABSTRACT

**Background:** Patients with chronic pain disorders exhibit increased levels of catecholamines alongside diminished activity of catechol-O-methyltransferase (COMT), an enzyme that metabolizes catecholamines. The authors found that acute pharmacologic inhibition of COMT in rodents produces hypersensitivity to mechanical and thermal stimuli *via*  $\beta$ -adrenergic receptor ( $\beta$ AR) activation. The contribution of distinct  $\beta$ AR populations to the development of persistent pain linked to abnormalities in catecholamine signaling requires further investigation.

**Methods:** Here, the authors sought to determine the contribution of peripheral, spinal, and supraspinal  $\beta$ ARs to persistent COMT-dependent pain. They implanted osmotic pumps to deliver the COMT inhibitor OR486 (Tocris, USA) for 2 weeks. Behavioral responses to mechanical and thermal stimuli were evaluated before and every other day after pump implantation. The site of action was evaluated in adrenalectomized rats receiving sustained OR486 or in intact rats receiving sustained  $\beta$ AR antagonists peripherally, spinally, or supraspinally alongside OR486.

**Results:** The authors found that male (N = 6) and female (N = 6) rats receiving sustained OR486 exhibited decreased paw withdrawal thresholds (control  $5.74 \pm 0.24$  vs. OR486  $1.54 \pm 0.08$ , mean  $\pm$  SEM) and increased paw withdrawal frequency to mechanical stimuli (control  $4.80 \pm 0.22$  vs. OR486  $8.10 \pm 0.13$ ) and decreased paw withdrawal latency to thermal heat (control  $9.69 \pm 0.23$  vs. OR486  $5.91 \pm 0.11$ ). In contrast, adrenalectomized rats (N = 12) failed to develop OR486-induced hypersensitivity. Furthermore, peripheral (N = 9), but not spinal (N = 4) or supraspinal (N = 4), administration of the nonselective  $\beta$ AR antagonist propranolol, the  $\beta_2$ AR antagonist ICI-118,511, or the  $\beta_3$ AR antagonist SR59230A blocked the development of OR486-induced hypersensitivity.

**Conclusions:** Peripheral adrenergic input is necessary for the development of persistent COMT-dependent pain, and peripherally-acting  $\beta$ AR antagonists may benefit chronic pain patients. (ANESTHESIOLOGY 2016; 124:1122-35)

CHRONIC pain disorders, including fibromyalgia, headache, temporomandibular disorder (TMD), and vestibulodynia, constitute a significant healthcare problem, affecting more than 100 million Americans.<sup>1–7</sup> These disorders occur more frequently in women than in men<sup>8</sup> and are persistent in nature, characterized by pain that occurs daily and spans years. While the mechanisms underlying chronic pain are poorly understood, emerging evidence indicates a role for adrenergic pathways. Patients with chronic pain exhibit increased levels of catecholamines<sup>9–11</sup> alongside diminished activity of catechol-O-methyltransferase (COMT),<sup>12,13</sup> a ubiquitously expressed enzyme that metabolizes catecholamines to their inactive derivatives.<sup>14</sup> An increase in catecholamines is similarly observed in patients with inflammatory conditions such as arthritis and complex regional pain syndrome (CRPS).<sup>15–17</sup> Furthermore, functional variants in the *COMT* gene that reduce COMT activity<sup>13,18,19</sup> are associated with increased susceptibility to fibromyalgia,<sup>20–24</sup> TMD,<sup>25</sup> and experimental pain<sup>25,26</sup> as well as impaired response to treatment.<sup>27,28</sup> It is estimated, based on the frequency of allele

### What We Already Know about This Topic

- Decreased catecholamine-O-methyltransferase activity is associated with increased clinical and experimental pain in humans, and inhibition of catecholamine-O-methyltransferase in animals results in hypersensitivity
- Although  $\beta$ -adrenoceptors appear important to these observations, the sites of receptor activation are unknown

### What This Article Tells Us That Is New

- In rats, sustained administration of a catecholamine-O-methyltransferase inhibitor produces hypersensitivity to mechanical and thermal stimuli, which is prevented by peripheral, but not spinal or supraspinal, administration of  $\beta$ -adrenoceptor antagonists, suggesting a peripheral site of action

variation, that nearly two thirds of patients with chronic pain disorders possess the low-activity COMT variants.<sup>20,29</sup>

Consistent with clinical disorders, we found in our laboratory that administration of the COMT inhibitor OR486 (Tocris, USA) in rodents produces increased hypersensitivity at multiple body sites and alters cognitive–affective

Corresponding article on page 994. Supplemental Digital Content is available for this article. Direct URL citations appear in the printed text and are available in both the HTML and PDF versions of this article. Links to the digital files are provided in the HTML text of this article on the Journal's Web site ([www.anesthesiology.org](http://www.anesthesiology.org)).

Submitted for publication August 31, 2015. Accepted for publication February 9, 2016. From the Dental Research Department, Center for Pain Research and Innovation, University of North Carolina, Chapel Hill, North Carolina. Current affiliation: Center for Translational Pain Medicine, Department of Anesthesiology, Duke University School of Medicine, Durham, North Carolina (A.G.N.).

Copyright © 2016, the American Society of Anesthesiologists, Inc. Wolters Kluwer Health, Inc. All Rights Reserved. Anesthesiology 2016; 124:1122-35

behaviors linked to pain (*e.g.*, avoidance of painful heat and bright light).<sup>30–32</sup> Pharmacologic studies further revealed that OR486-induced hypersensitivity is blocked by administration of the nonselective  $\beta$ -adrenergic receptor ( $\beta$ AR) antagonist propranolol or by combined administration of selective  $\beta_2$ - and  $\beta_3$ AR antagonists.<sup>30–32</sup> These results are in line with those from clinical studies, showing that propranolol alleviates pain among fibromyalgia and TMD patients.<sup>33,34</sup> Collectively, these studies suggest that increased catecholamine levels, resulting from reduced COMT activity, drive pain *via*  $\beta_2$ - and  $\beta_3$ ARs.

$\beta_2$ - and  $\beta_3$ ARs are G-protein-coupled receptors expressed in peripheral and central regions where they could drive pain.  $\beta_2$ ARs are located on peripheral terminals<sup>35–39</sup> and cell bodies<sup>40–42</sup> of primary afferent nociceptors; keratinocytes,<sup>43–45</sup> immune cells,<sup>46–49</sup> and adipocytes<sup>50</sup> in the periphery; and neurons<sup>51,52</sup> and glial cells<sup>53</sup> in the central nervous system.  $\beta_3$ ARs are located on primary afferent nociceptors,<sup>54</sup> adipocytes<sup>50</sup> and immune cells<sup>47,48</sup> in the periphery, and noradrenergic neurons in the brain.<sup>55</sup> Thus, we hypothesized that peripheral, spinal, and/or supraspinal  $\beta_2$ - and  $\beta_3$ ARs contribute to persistent COMT-dependent pain.

To test this hypothesis, we employed a clinically-relevant model of persistent COMT-dependent pain and evaluated responses to mechanical and thermal stimuli in adrenalectomized rats lacking peripheral epinephrine, and in intact rats receiving continuous delivery of  $\beta$ AR antagonists *via* intraplantar, intrathecal, or intracerebroventricular routes. Potential sexual dimorphism in the contribution of adrenergic systems to persistent COMT-dependent pain was also assessed.

Results demonstrated that male and female rats receiving sustained OR486 exhibited COMT-dependent mechanical and thermal hypersensitivity, persisting for 2 weeks. In contrast, adrenalectomized rats failed to develop OR486-induced hypersensitivity. Furthermore, intraplantar, but not intrathecal or intracerebroventricular, administration of the nonselective  $\beta$ AR antagonist propranolol,  $\beta_2$ AR antagonist ICI118,551, or  $\beta_3$ AR antagonist SR59230A blocked OR486-induced hypersensitivity. These findings demonstrate the importance of peripheral  $\beta_2$ - and  $\beta_3$ ARs in mediating persistent pain and suggest that peripherally-acting  $\beta$ AR antagonists may provide an effective treatment option for patients with chronic pain disorders.

## Materials and Methods

### Subjects

Adult male and female Sprague–Dawley rats (N = 24 intact, N = 24 adrenalectomized, and N = 23 sham) were purchased (Charles River Laboratories, USA) for the first set of experiments. For subsequent  $\beta$ AR antagonist experiments, adult male Sprague–Dawley rats (N = 111) were bred in-house. Rats weighed between 200 and 400 g for all experimental studies. Rats had *ad libitum* access to standard laboratory

chow and water. Adrenalectomized rats were provided with saline water (0.9%) to compensate for the loss of sodium in urine due to the absence of aldosterone. All animal procedures were approved by the Institutional Animal Care and Use Committee at the University of North Carolina at Chapel Hill. Although rodent models of pain only partially correlate with human conditions, rats were chosen for these experiments because an extensive body of literature exists regarding nociceptive pathways and behavior in this species and because rat pain behavior assays are readily available and well characterized.<sup>56–58</sup>

### General Experimental Conditions

First, the effects of sustained COMT inhibition on hypersensitivity were evaluated in intact rats receiving the COMT inhibitor OR486 or vehicle systemically for 14 days *via* a 2002 Alzet Osmotic Pump (Durect Corporation, USA). Next, the contribution of peripheral adrenergic systems to persistent OR486-induced hypersensitivity was evaluated in adrenalectomized rats lacking peripheral epinephrine or sham rats receiving OR486 or vehicle systemically for 14 days *via* an osmotic pump. Finally, the contribution of peripheral, spinal, and supraspinal  $\beta$ ARs to persistent OR486-induced hypersensitivity was evaluated in separate groups of intact rats receiving intraplantar, intrathecal, or intracerebroventricular  $\beta$ AR antagonists alongside systemic delivery of OR486 or vehicle for 14 days *via* an osmotic pump. The  $\beta$ AR antagonists were delivered *via* a catheter attached to a separate 2002 Alzet Osmotic Pump.

Animals were handled and habituated to the experimenter and environment for 4 days before testing. Responses to punctuate mechanical and thermal stimuli were assessed in intact and adrenalectomized animals 1 day before and on days 1, 3, 5, 7, 9, 11, and 13 after pump implantation. For  $\beta$ AR antagonist experiments, pain behaviors were assessed 1 day before and on days 2, 4, 6, 8, 10, 12, and 14 after pump implantation. The rest day between surgery and testing allowed animals to fully recover from catheter implantation. On baseline and testing days, rats were habituated to the mechanical and thermal testing environments for 10 to 15 min. Although we were unable to eliminate all environmental factors (*e.g.*, season, humidity, and noise) from this study, we minimized others (*e.g.*, experimenter consistency, testing time of day, and cage density) that were in our control.<sup>59,60</sup> Animals were randomly assigned to groups; were tested by a single, blinded experimenter at a consistent time of day (morning); and were housed with one to two other rats. The primary outcome reported in this study is behavioral changes, in the form of mechanical allodynia, mechanical hyperalgesia, and thermal hyperalgesia, which are described in detail below under their respective subtitles.

### Drug Preparation

OR486 (Tocris) was dissolved in a 5:3:2 ratio of dimethylsulfoxide, 0.9% saline, and ethanol.<sup>32</sup> For peripheral

experiments,  $\beta$ AR antagonists propranolol hydrochloride (Tocris), ICI-118,511 (Tocris), and SR59230A (Tocris) were each dissolved in 5:3:2 ratios of dimethylsulfoxide, 0.9% saline, and ethanol. For intrathecal and intracerebroventricular experiments,  $\beta$ AR antagonists were dissolved in 0.9% saline. Drug solutions were injected into pumps, which were placed in 15-ml conical tubes containing sterile 0.9% saline and primed overnight in a dry heat bath (Lab Armor, USA) at 37°C. All pumps (other than those for intrathecal delivery) were attached to corresponding catheters before priming. Subcutaneous delivery of OR486 was at a constant rate of  $15 \text{ mg} \cdot \text{kg}^{-1} \cdot \text{day}^{-1}$  for a 2-week period. Peripheral delivery of propranolol hydrochloride was at  $9 \text{ mg} \cdot \text{kg}^{-1} \cdot \text{day}^{-1}$ , ICI-118,511 was at  $1.5 \text{ mg} \cdot \text{kg}^{-1} \cdot \text{day}^{-1}$ , and SR59230A was at  $1.67 \text{ mg} \cdot \text{kg}^{-1} \cdot \text{day}^{-1}$ . Intrathecal delivery of propranolol hydrochloride was at  $50 \text{ } \mu\text{g}/\text{day}$  for the low-dose experiments and  $100 \text{ } \mu\text{g}/\text{day}$  for the high-dose experiments, ICI-118,511 was at  $30 \text{ } \mu\text{g}/\text{day}$ , and SR59230A was at  $20 \text{ } \mu\text{g}/\text{day}$ . Intracerebroventricular delivery of propranolol hydrochloride was at  $50 \text{ } \mu\text{g}/\text{day}$  for the low-dose experiments and  $100 \text{ } \mu\text{g}/\text{day}$  for the high-dose experiments; ICI-118,511 delivery was at  $30 \text{ } \mu\text{g}/\text{day}$ , and SR59230A delivery was at  $20 \text{ } \mu\text{g}/\text{day}$ .

### Surgical Procedures

For all surgical procedures, rats were anesthetized by isoflurane inhalation (5% induction, 1.5 to 5% maintenance). Incision sites were shaved and disinfected with ethanol and betadine. Sterile technique was employed throughout the duration of all procedures according to Institutional Animal Care and Use Committee requirements. Stainless steel wound clips (Braintree Scientific, USA) were used to close the wounds.

For systemic delivery of OR486, a small incision was made over the left shoulder blade of the rat. Hemostats were used to create a small subcutaneous pocket in which the pump was placed.

For intraplantar delivery of  $\beta$ AR antagonists, a modified version of the protocol published by Haddad and Adams<sup>61</sup> was used. Pumps were attached to a 15-cm, Y-shaped, bifurcated 3-French silicone catheter (SAI Infusion Technologies, USA). The pump was implanted subcutaneously over the right shoulder blade, and a stainless steel 10-gauge  $\times$  20-cm semiblunt tip trocar (SAI Infusion Technologies) was used to subcutaneously route the catheter ends to incisions made at either hind paw. The catheter ends were attached to the plantar fascia using 4-0 silk sutures (Oasis Medical, USA).

For intrathecal delivery<sup>62</sup> of  $\beta$ AR antagonists, a small incision was made on the nape of the neck, and scissors and hemostats were used to lift muscle and expose the atlanto-occipital membrane. The membrane was carefully incised using the tip of scissors, causing the escape of cerebrospinal fluid. A 27.3-cm, polyurethane Alzet Short Rat IT Catheter (Durect Corporation) was inserted into the intrathecal space, dorsal to the spinal cord. The other end of the catheter was sutured to the surrounding tissue and attached to the

osmotic pump, which was subcutaneously implanted over the right shoulder blade. Four animals did not wake up after intrathecal surgery. These animals were replaced in future intrathecal groups to account for the decrease in sample size.

For intracerebroventricular delivery<sup>63</sup> of  $\beta$ AR antagonists, pumps were attached to a 38-gauge stainless steel cannula *via* a short vinyl catheter (Alzet Brain Infusion Kit 2; Durect Corporation). The cannula was implanted into the right lateral ventricle (from the bregma:  $-0.8 \text{ mm}$  anteroposterior,  $-1.6 \text{ mm}$  mediolateral,  $-5 \text{ mm}$  dorsoventral) and was cemented to two anchoring screws on the skull. The attached pump was subcutaneously implanted over the right shoulder blade.

### Assessment of Behavioral Responses to Mechanical and Thermal Stimuli

Paw withdrawal threshold was assessed using the von Frey up-down method.<sup>64</sup> Nine calibrated and logarithmically spaced von Frey monofilaments (bending forces: 0.40, 0.68, 1.1, 2.1, 3.4, 5.7, 8.4, 13.2, and 15.0 g; Stoelting, USA) were applied to the plantar hind paw. First, the middle filament (3.4 g) was applied to the hind paw for 3 s. If the rat responded with a withdrawal, an incrementally lower filament was applied. In the absence of a withdrawal, an incrementally higher filament was applied. A series of six total responses were recorded for each paw. Results were entered into the Paw Flick module within the National Instruments LabVIEW 2.0 software (LabVIEW, USA), which uses a logarithmic algorithm to determine the gram-force value that would elicit paw withdrawal in 50% of trials ( $10^{(X_f + k\delta)}/10,000$ , where  $X_f$  = value [in log units] of the final von Frey hair used;  $k$  = tabular value of positive and negative responses, and  $\delta$  = mean difference [in log units] between stimuli). Mechanical allodynia was defined as a heightened response to a normally innocuous stimulus, as determined by a decrease in paw withdrawal threshold.

Mechanical hyperalgesia was assessed using a 15.0-g von Frey filament. This filament was chosen as a normally noxious stimulus, as it has a gram-force value well over the 50% withdraw threshold for animals tested in this study. The filament was applied to the hind paw 10 times for a duration of 1 s, with an interstimulus interval of 1 s.<sup>32</sup> The number of paw withdrawals (which could range from 0 to 10) was recorded for each hind paw at each time point. Mechanical hyperalgesia was defined as an increase in the number of paw withdrawals in response to a normally noxious mechanical stimulus.

Thermal hyperalgesia was assessed using the Hargreaves method.<sup>65</sup> Animals were placed in plexiglass chambers, and a radiant beam of light was applied to the hind paw through a glass floor heated to 30°C. Paw withdrawal latencies were recorded in duplicate per paw. If the second latency recorded was not within  $\pm 4 \text{ s}$  of the first, a third measure was recorded. The two latencies closest in value were averaged to determine overall latency to withdrawal. Thermal behavioral data are

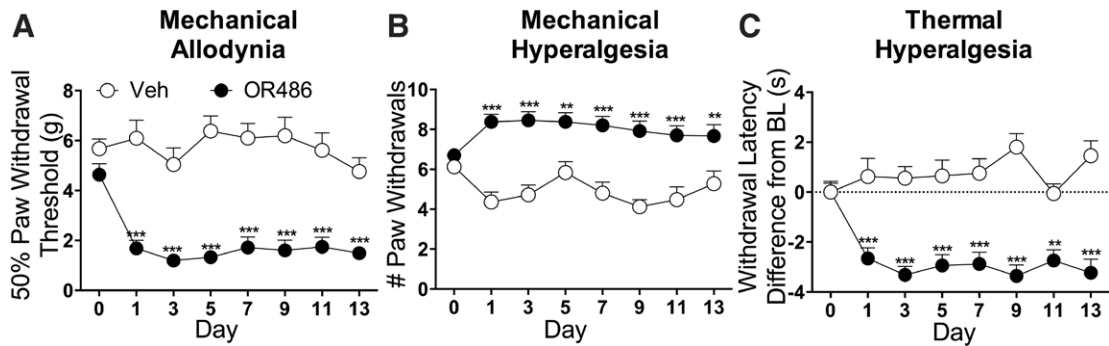

**Fig. 1.** Sustained administration of the catecholamine-O-methyltransferase inhibitor OR486 leads to mechanical and thermal hypersensitivity. Compared to vehicle, sustained systemic OR486 administration produces (A) mechanical allodynia, (B) mechanical hyperalgesia, and (C) thermal hyperalgesia.  $N = 12$  (6 males and 6 females) per group. Data are expressed as mean  $\pm$  SEM. \*\*\* $P < 0.001$ , \*\* $P < 0.01$  different from vehicle. BL = baseline; Veh = vehicle.

reported in text and figures as the difference in paw withdrawal latency from baseline (day 0). Thermal hyperalgesia was defined as a decrease in paw withdrawal latency in response to a noxious thermal stimulus.

### Statistical Analyses

Sample sizes were selected based on their ability in previous, similarly structured rat studies to accurately demonstrate behavioral differences between groups.<sup>30–32</sup> Mechanical allodynia, mechanical hyperalgesia, and thermal hyperalgesia data were analyzed by 2-way ANOVA (for group  $\times$  time). In ANOVA analyses, groups correspond to the separate groups on the graph of interest, as denoted by different symbols and names (e.g., groups in fig. 1 = vehicle and OR486). *Post hoc* comparisons were performed using the Bonferroni test, which corrected for multiple comparisons. Statistical significance was defined as  $P < 0.05$ . All statistical analyses were performed using GraphPad Prism (GraphPad Software, USA).

## Results

### Sustained COMT Inhibition Produces Persistent Pain

Genetic and pharmacologic alterations resulting in reduced COMT activity are associated with increased experimental pain and likelihood of developing chronic pain disorders. Acute administration of the COMT inhibitor OR486 results in enhanced mechanical and thermal hypersensitivity in rats.<sup>32</sup> To evaluate the effects of sustained COMT inhibition on hypersensitivity, responses to mechanical and thermal stimuli were measured in separate groups of rats receiving systemic OR486 ( $15 \text{ mg} \cdot \text{kg}^{-1} \cdot \text{day}^{-1}$ ) or vehicle over a 2-week period. Compared to rats receiving vehicle, those receiving OR486 exhibited mechanical allodynia (group:  $P < 0.0001$ ; group  $\times$  day:  $P = 0.0043$ ; fig. 1A), mechanical hyperalgesia (group:  $P < 0.0001$ ; group  $\times$  day:  $P = 0.0109$ ; fig. 1B), and thermal hyperalgesia (group:  $P < 0.0001$ ; group  $\times$  day:  $P < 0.0001$ ; fig. 1C) beginning on day 1 and lasting throughout the duration of the experiment. Sexual dimorphism was not observed, as both male and female rats

developed mechanical allodynia (male group:  $P < 0.0001$ ; female group:  $P < 0.0001$ ; fig. 1A, Supplemental Digital Content 1, <http://links.lww.com/ALN/B262>), mechanical hyperalgesia (male group,  $P < 0.0053$ ; female group:  $P < 0.0001$ ; fig. 1B, Supplemental Digital Content 1, <http://links.lww.com/ALN/B262>), and thermal hyperalgesia (male group:  $P < 0.0001$ ; female group:  $P < 0.0001$ ; fig. 1C, Supplemental Digital Content 1, <http://links.lww.com/ALN/B262>). See figure 1, Supplemental Digital Content 1 (<http://links.lww.com/ALN/B262>), for all sexual dimorphism data in intact rats.

### Adrenalectomized Rats Fail to Develop Persistent COMT-dependent Pain

Previous work has demonstrated that acute COMT-dependent pain is mediated *via*  $\beta_2$ - and  $\beta_3$ ARs, which are located in peripheral, spinal, and supraspinal regions where they could potentially drive pain transmission. To evaluate the potential contribution of peripheral adrenergic systems to COMT-dependent pain, separate groups of adrenalectomized rats (lacking peripheral epinephrine) or sham surgery rats received systemic OR486 ( $15 \text{ mg} \cdot \text{kg}^{-1} \cdot \text{day}^{-1}$ ) or vehicle over a 2-week period, and responses to mechanical and thermal stimuli were measured. Compared to sham rats receiving vehicle, those receiving OR486 developed mechanical allodynia (group:  $P < 0.0001$ ; group  $\times$  day:  $P < 0.0001$ ; fig. 2A), mechanical hyperalgesia (group:  $P < 0.0001$ ; group  $\times$  day:  $P = 0.0044$ ; fig. 2B), and thermal hyperalgesia (group:  $P = 0.0005$ ; group  $\times$  day:  $P < 0.0001$ ; fig. 2C). In contrast, adrenalectomized rats did not develop mechanical allodynia, mechanical hyperalgesia, or thermal hyperalgesia.

Sexual dimorphism was not observed, as both male and female sham rats developed mechanical allodynia (male group:  $P < 0.0001$ ; female group:  $P < 0.0001$ ; fig. 2A, Supplemental Digital Content 1, <http://links.lww.com/ALN/B262>), mechanical hyperalgesia (male group:  $P = 0.0053$ ; female group:  $P < 0.0001$ ; fig. 2B, Supplemental Digital Content 1, <http://links.lww.com/ALN/B262>), and



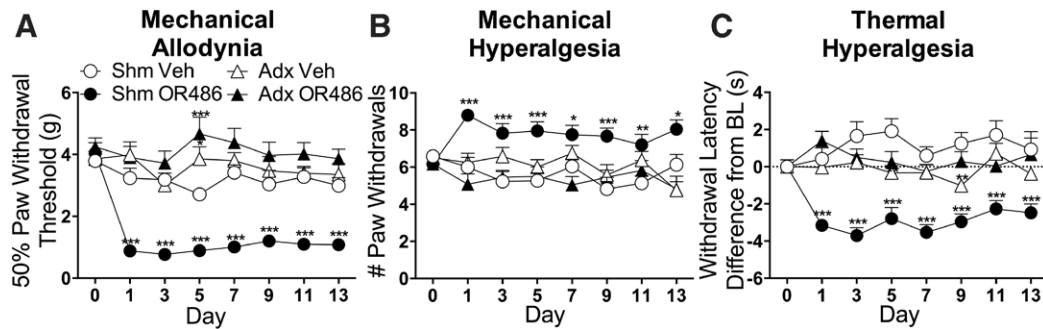

**Fig. 2.** Adrenalectomized (Adx) rats fail to develop OR486-induced hypersensitivity. In Sham (Shm), but not Adx, animals, sustained systemic OR486 administration produces (A) mechanical allodynia, (B) mechanical hyperalgesia, and (C) thermal hyperalgesia.  $N = 11$  (5 males and 6 females) for Shm/vehicle (Veh) and  $N = 12$  (6 males and 6 females) for all other groups. Data are expressed as mean  $\pm$  SEM. \*\*\* $P < 0.001$ , \*\* $P < 0.01$ , \* $P < 0.05$  different from Shm/Veh. BL = Baseline.

thermal hyperalgesia (male group:  $P < 0.0001$ ; female group:  $P < 0.0001$ ; fig. 2C, Supplemental Digital Content 1, <http://links.lww.com/ALN/B262>). Both male and female adrenalectomized rats failed to develop mechanical allodynia (fig. 2D, Supplemental Digital Content 1, <http://links.lww.com/ALN/B262>), mechanical hyperalgesia (fig. 2E, Supplemental Digital Content 1, <http://links.lww.com/ALN/B262>), and thermal hyperalgesia (fig. 2F, Supplemental Digital Content 1, <http://links.lww.com/ALN/B262>). See figure 2, Supplemental Digital Content 1 (<http://links.lww.com/ALN/B262>), for all sexual dimorphism data in sham and adrenalectomized rats.

### Peripheral $\beta$ AR Antagonist Administration Prevents the Development of Persistent COMT-dependent Pain

Adrenalectomized rats failed to develop persistent hypersensitivity after COMT inhibition, suggesting a peripheral adrenergic site of action. In order to further investigate this hypothesis, pharmacological methods were used to determine the contribution of peripheral, spinal, and supraspinal  $\beta$ ARs to persistent COMT-dependent pain. First, the contribution of peripheral  $\beta$ ARs to mechanical and thermal hypersensitivity was evaluated in separate groups of rats receiving sustained intraplantar administration of propranolol ( $9 \text{ mg} \cdot \text{kg}^{-1} \cdot \text{day}^{-1}$ ), ICI-118,551 ( $1.5 \text{ mg} \cdot \text{kg}^{-1} \cdot \text{day}^{-1}$ ), SR59230A ( $1.67 \text{ mg} \cdot \text{kg}^{-1} \cdot \text{day}^{-1}$ ), or vehicle alongside sustained systemic administration of OR486 ( $15 \text{ mg} \cdot \text{kg}^{-1} \cdot \text{day}^{-1}$ ) or vehicle over a 2-week period. Peripheral antagonist doses were selected based on the results from a preliminary study that evaluated the ability of three different doses per antagonist to reduce or block COMT-dependent pain (fig. 3).

Compared to rats receiving vehicle, those receiving sustained intraplantar administration of the nonselective  $\beta$ AR antagonist propranolol, the  $\beta_2$ AR antagonist ICI-118,511, or the  $\beta_3$ AR antagonist SR59230A alongside systemic OR486 did not develop mechanical allodynia (group: fig. 3A,  $P < 0.0001$ ; fig. 3B,  $P < 0.0001$ ; fig. 3C,  $P < 0.0001$ ) or mechanical hyperalgesia (group: fig. 3D,  $P < 0.0001$ ; fig. 3E,  $P < 0.0001$ ; fig. 3F,  $P < 0.0001$ ). Rats

receiving sustained intraplantar administration of the  $\beta_3$ AR antagonist SR59230A also did not develop OR486-induced thermal hyperalgesia (group: fig. 3I,  $P < 0.0001$ ). In contrast, rats receiving propranolol (fig. 3G) or ICI-118,551 (fig. 3H) alongside OR486 exhibited a 15% decrease in paw withdrawal latency from baseline, similar to rats receiving vehicle. Animals receiving sustained intraplantar administration of  $\beta$ AR antagonists alongside systemic vehicle failed to develop mechanical allodynia (fig. 3A, Supplemental Digital Content 1, <http://links.lww.com/ALN/B262>), mechanical hyperalgesia (fig. 3D, Supplemental Digital Content 1, <http://links.lww.com/ALN/B262>), or thermal hyperalgesia (fig. 3G, Supplemental Digital Content 1, <http://links.lww.com/ALN/B262>). See figure 3, Supplemental Digital Content 1 (<http://links.lww.com/ALN/B262>), for control data demonstrating no effect of antagonists on hypersensitivity irrespective of administration route.

### Intrathecal $\beta$ AR Antagonist Administration Does Not Alter Persistent COMT-dependent Pain

Next, the contribution of spinal  $\beta$ ARs to mechanical and thermal hypersensitivity was evaluated in separate groups of rats receiving sustained intrathecal administration of propranolol ( $50 \text{ } \mu\text{g}/\text{day}$ ), ICI-118,551 ( $30 \text{ } \mu\text{g}/\text{day}$ ), SR59230A ( $20 \text{ } \mu\text{g}/\text{day}$ ), or vehicle alongside sustained systemic administration of OR486 ( $15 \text{ mg} \cdot \text{kg}^{-1} \cdot \text{day}^{-1}$ ) or vehicle over a 2-week period (fig. 4). Intrathecal delivered antagonist doses were selected based on their ability to block hypersensitivity or pain-relevant behaviors in other rat models when administered intrathecally.<sup>66–68</sup> Similar to animals receiving vehicle, those receiving sustained intrathecal administration of the nonselective  $\beta$ AR antagonist propranolol, the  $\beta_2$ AR antagonist ICI-118,511, or the  $\beta_3$ AR antagonist SR59230A alongside systemic OR486 exhibited mechanical allodynia (group: fig. 4A,  $P < 0.0001$ ; fig. 4B,  $P < 0.0001$ ; fig. 4C,  $P < 0.0001$ ), mechanical hyperalgesia (group: fig. 4D,  $P = 0.0002$ ; fig. 4E,  $P < 0.0001$ ; fig. 4F,  $P = 0.0018$ ), and thermal hyperalgesia (group: fig. 4G,  $P < 0.0001$ ; fig. 4H,  $P < 0.0001$ ; fig. 4I,  $P < 0.0001$ ). Animals receiving sustained intrathecal administration of  $\beta$ AR antagonists alongside systemic vehicle failed

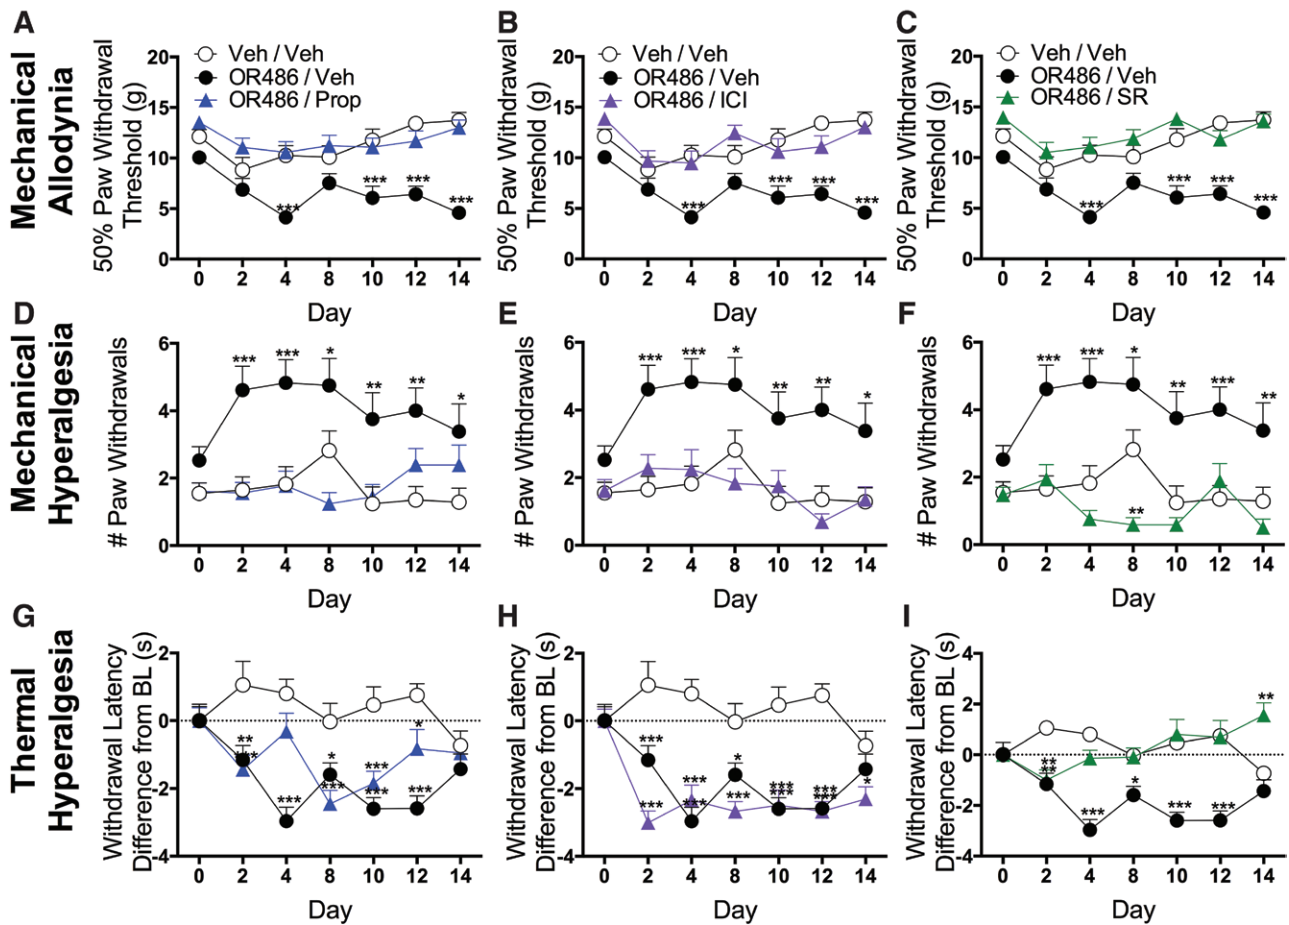

**Fig. 3.** Peripheral administration of  $\beta$ -adrenergic receptor ( $\beta$ AR) antagonists blocks OR486-induced hypersensitivity. Peripheral delivery of the nonselective  $\beta$ AR antagonist propranolol (Prop) alongside sustained systemic OR486 administration prevents (A) mechanical allodynia and (D) mechanical hyperalgesia but does not alter (G) thermal hyperalgesia. Similarly, peripheral delivery of the  $\beta_2$ AR antagonist ICI-118,551 (ICI) alongside sustained systemic OR486 administration prevents (B) mechanical allodynia and (E) mechanical hyperalgesia but does not alter (H) thermal hyperalgesia. Finally, peripheral delivery of the  $\beta_3$ AR antagonist SR59230A (SR) alongside sustained systemic OR486 administration prevents (C) mechanical allodynia, (F) mechanical hyperalgesia, and (I) thermal hyperalgesia.  $N = 9$  per group. Data are expressed as mean  $\pm$  SEM. \*\*\* $P < 0.001$ , \*\* $P < 0.01$ , \* $P < 0.05$  different from vehicle (Veh)/Veh. BL = Baseline.

to develop mechanical allodynia (fig. 3B, Supplemental Digital Content 1, <http://links.lww.com/ALN/B262>), mechanical hyperalgesia (fig. 3E, Supplemental Digital Content 1, <http://links.lww.com/ALN/B262>), or thermal hyperalgesia (fig. 3H, Supplemental Digital Content 1, <http://links.lww.com/ALN/B262>). Animals receiving SR59230A alongside vehicle did exhibit transient elevations in paw withdrawal threshold on days 2 (vehicle/vehicle  $4.47 \pm 0.63$  vs. vehicle/SR59230A  $10.80 \pm 3.26$ , mean  $\pm$  SEM) and 10 (vehicle/vehicle  $3.50 \pm 0.73$  vs. vehicle/SR59230A  $10.97 \pm 3.13$ ) likely due to higher baseline values (vehicle/vehicle  $4.76 \pm 0.55$  vs. vehicle/SR59230A  $8.54 \pm 2.59$ ) and increased intergroup variability as compared to control animals (fig. 3B, Supplemental Digital Content 1, <http://links.lww.com/ALN/B262>).

To confirm that intrathecal  $\beta$ AR antagonists were unable to block OR486-induced hypersensitivity, we performed a

duplicate set of experiments using a higher dose of the nonselective  $\beta$ AR antagonist propranolol (100  $\mu$ g/day). Similar to the original dose, intrathecal administration of the higher dose did not block OR486-induced mechanical allodynia (group:  $P < 0.0001$ ; fig. 4A, Supplemental Digital Content 1, <http://links.lww.com/ALN/B262>), mechanical hyperalgesia (group:  $P = 0.0011$ ; fig. 4D, Supplemental Digital Content 1, <http://links.lww.com/ALN/B262>), or thermal hyperalgesia (group:  $P < 0.0001$ ; fig. 4G, Supplemental Digital Content 1, <http://links.lww.com/ALN/B262>). See figure 4, Supplemental Digital Content 1 (<http://links.lww.com/ALN/B262>), for all intrathecal high-dose propranolol data.

#### **Intracerebroventricular $\beta$ AR Antagonist Administration Does Not Alter Persistent COMT-dependent Pain**

Finally, the contribution of supraspinal  $\beta$ ARs to mechanical and thermal hypersensitivity was evaluated in separate

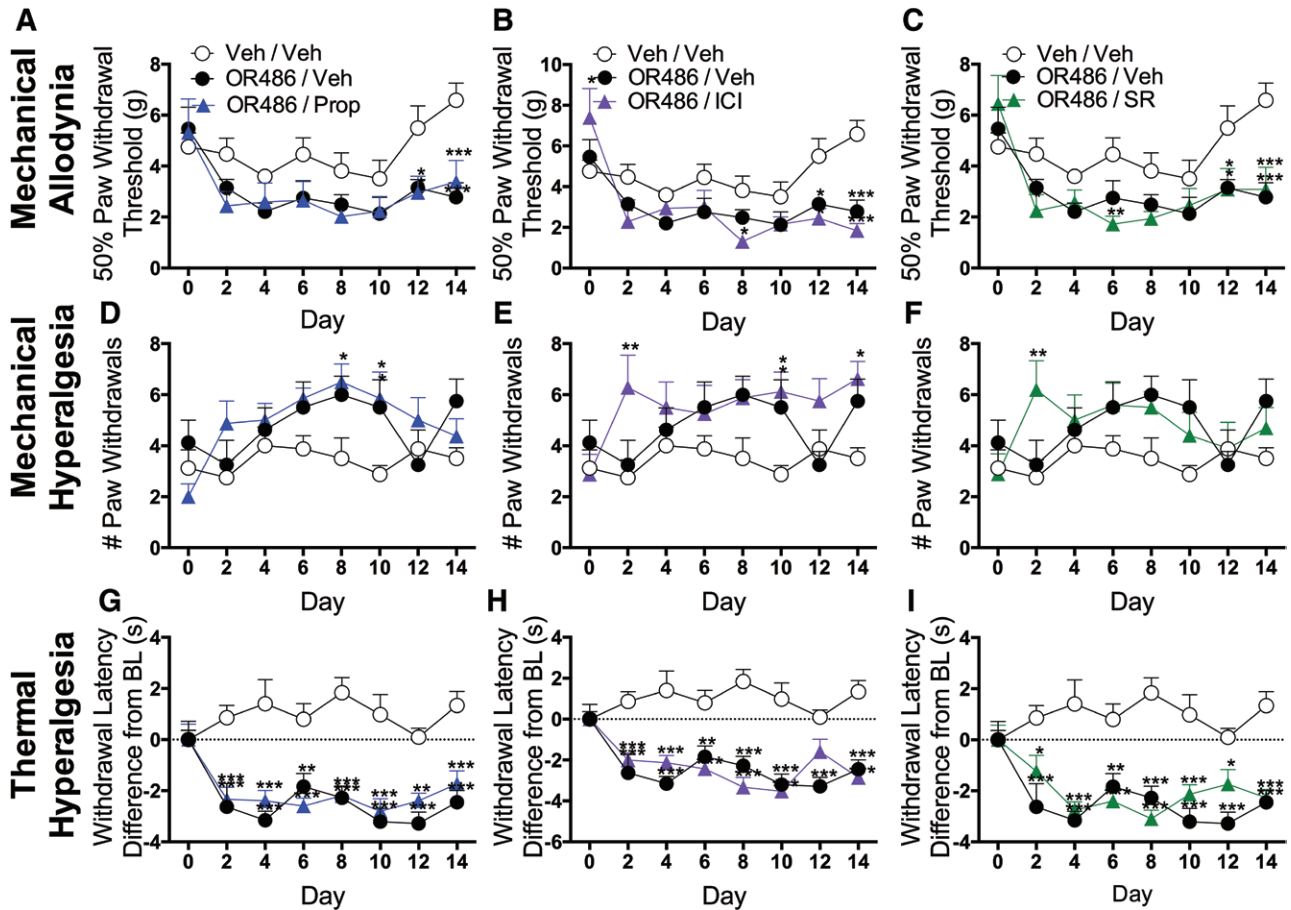

**Fig. 4.** Intrathecal administration of  $\beta$ -adrenergic receptor ( $\beta$ AR) antagonists does not alter OR486-induced hypersensitivity. Intrathecal delivery of the nonselective  $\beta$ AR antagonist propranolol (prop) (A, D, G), the  $\beta_2$ AR antagonist ICI-118,551 (ICI) (B, E, H), or the  $\beta_3$ AR antagonist SR59230A (SR) (C, F, I) alongside sustained systemic OR486 administration does not alter mechanical or thermal sensitivity.  $N = 4$  per group. Data are expressed as mean  $\pm$  SEM. \*\*\* $P < 0.001$ , \*\* $P < 0.01$ , \* $P < 0.05$  different from vehicle (Veh)/Veh. BL = Baseline.

groups of rats receiving sustained intracerebroventricular administration of propranolol (50  $\mu$ g/day), ICI-118,551 (30  $\mu$ g/day), SR59230A (20  $\mu$ g/day), or vehicle alongside sustained systemic administration of OR486 (15 mg  $\cdot$  kg $^{-1}$   $\cdot$  day $^{-1}$ ) or vehicle over a 2-week period (fig. 5). Intracerebroventricular antagonist doses were selected based on their ability to block hypersensitivity or related behaviors in other rat models.<sup>66–68</sup> Similar to animals receiving vehicle, those receiving sustained intracerebroventricular administration of the nonselective  $\beta$ AR antagonist propranolol, the  $\beta_2$ AR antagonist ICI-118,511, or the  $\beta_3$ AR antagonist SR59230A alongside systemic OR486 exhibited mechanical allodynia (group: fig. 5A,  $P < 0.0001$ ; fig. 5B,  $P < 0.0001$ ; fig. 5C,  $P < 0.0001$ ), mechanical hyperalgesia (group: fig. 5D,  $P < 0.0001$ ; fig. 5E,  $P < 0.0001$ ; fig. 5F,  $P < 0.0001$ ), and thermal hyperalgesia (group: fig. 5G,  $P < 0.0001$ ; fig. 5H,  $P < 0.0001$ ; fig. 5I,  $P < 0.0001$ ). Animals receiving sustained intracerebroventricular administration of  $\beta$ AR antagonists alongside systemic vehicle failed to develop mechanical allodynia (fig. 3C, Supplemental Digital Content 1, <http://links.lww.com/ALN/B262>),

mechanical hyperalgesia (fig. 3F, Supplemental Digital Content 1, <http://links.lww.com/ALN/B262>), or thermal hyperalgesia (fig. 3I, Supplemental Digital Content 1, <http://links.lww.com/ALN/B262>). Animals receiving SR59230A alongside vehicle did exhibit transient elevations in paw withdrawal frequency on days 2 (vehicle/vehicle 1.88  $\pm$  0.40 *vs.* vehicle/SR59230A 4.62  $\pm$  0.86) and 8 (vehicle/vehicle 2.00  $\pm$  0.46 *vs.* vehicle/SR59230A 5.00  $\pm$  1.20) likely due to increased intergroup variability as compared to control animals (fig. 3F, Supplemental Digital Content 1, <http://links.lww.com/ALN/B262>).

To confirm that intracerebroventricular  $\beta$ AR antagonists are unable to block OR486-induced hypersensitivity, we performed a duplicate set of experiments using a higher dose of the nonselective  $\beta$ AR antagonist propranolol (100  $\mu$ g/day). Similar to the original dose, intracerebroventricular administration of the higher dose did not block OR486-induced mechanical allodynia (group:  $P < 0.0001$ ; fig. 5A, Supplemental Digital Content 1, <http://links.lww.com/ALN/B262>), mechanical hyperalgesia (group:



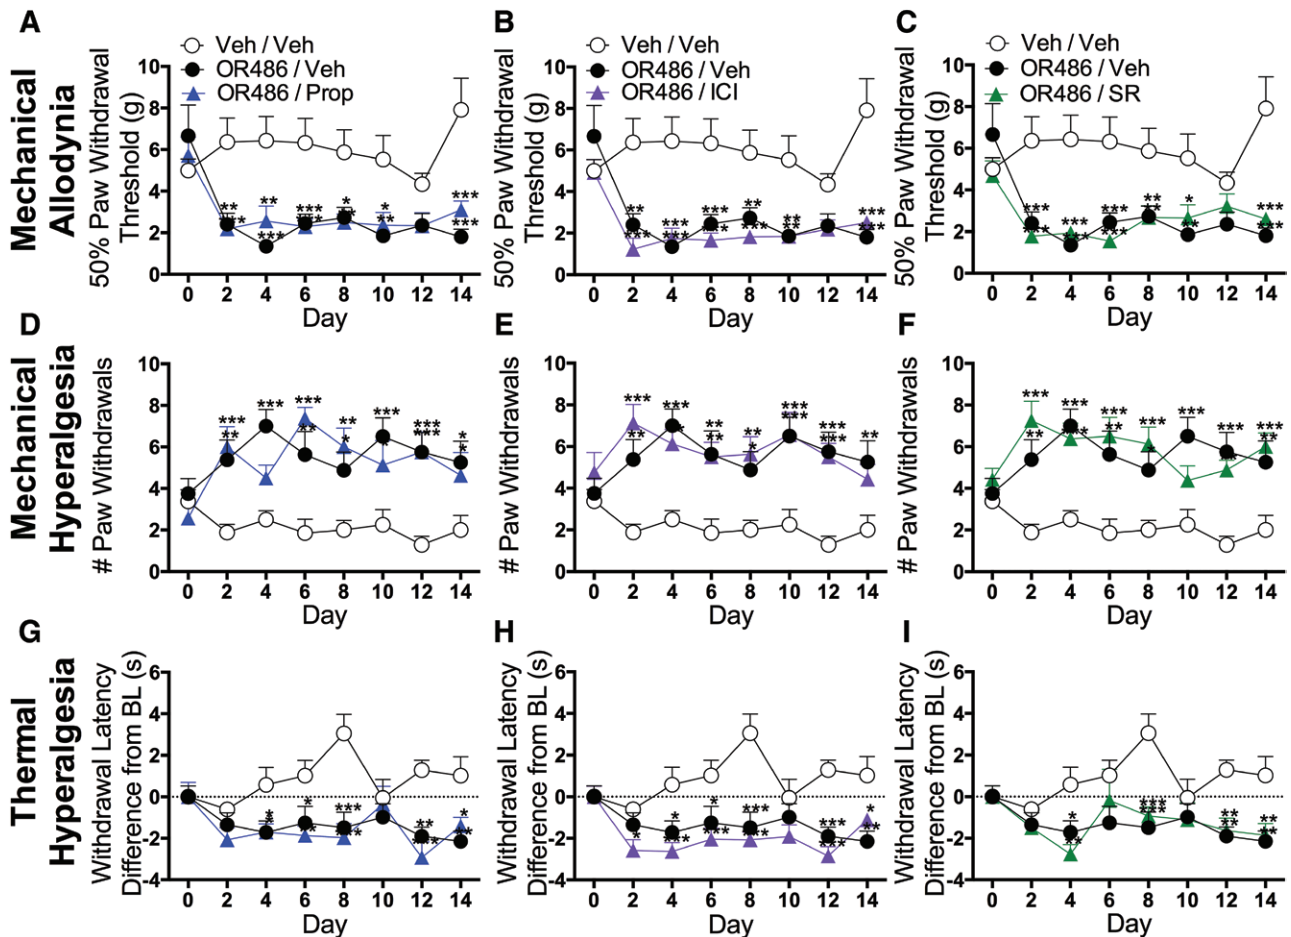

**Fig. 5.** Intracerebroventricular administration of  $\beta$ -adrenergic receptor ( $\beta$ AR) antagonists does not alter OR486-induced hypersensitivity. Supraspinal delivery of the nonselective  $\beta$ AR antagonist propranolol (prop) (A, D, G),  $\beta_2$ AR antagonist ICI-118,551 (ICI) (B, E, H), or the  $\beta_3$ AR antagonist SR59230A (SR) (C, F, I) alongside sustained systemic OR486 administration does not alter mechanical or thermal sensitivity.  $N = 4$ –5 per group. Data are expressed as mean  $\pm$  SEM. \*\*\* $P < 0.001$ , \*\* $P < 0.01$ , \* $P < 0.05$  different from vehicle (Veh)/Veh. BL = Baseline.

$P < 0.0001$ ; fig. 5D, Supplemental Digital Content 1, <http://links.lww.com/ALN/B262>), or thermal hyperalgesia (group:  $P < 0.0001$ ; fig. 5G, Supplemental Digital Content 1, <http://links.lww.com/ALN/B262>). See figure 5, Supplemental Digital Content 1 (<http://links.lww.com/ALN/B262>), for all intracerebroventricular high-dose propranolol data.

## Discussion

Although the mechanisms underlying chronic pain disorders are not well described, emerging evidence suggests a role for adrenergic pathways. Employing a rodent model of sustained COMT inhibition that mimics abnormalities in catecholamine signaling observed in patients with these disorders, we demonstrate that COMT-dependent pain is mediated *via* peripherally, but not spinally or supraspinally, located  $\beta_2$ - and  $\beta_3$ ARs.

In previous studies, we established a causal link between low COMT and pain. We demonstrated that a single

injection of the COMT inhibitor OR486 produces mechanical and thermal hypersensitivity, similar to that produced by intraplantar carrageenan. Subsequent pharmacological studies further demonstrated that the development of acute OR486-induced hypersensitivity requires activation of  $\beta_2$ - and  $\beta_3$ ARs.<sup>30,32</sup> Within hours, administration of OR486 results in increased circulating levels of nitric oxide and the proinflammatory cytokines tumor necrosis factor- $\alpha$ , interleukin-1 $\beta$ , interleukin-6, and chemokine (C-C motif) ligand 2 (CCL2),<sup>30</sup> which are nociceptive transmitters implicated in chronic pain. Individuals with fibromyalgia, headache, and TMD exhibit increased levels of these molecules,<sup>69–72</sup> which elicit pain by reducing nociceptor firing thresholds.<sup>73–83</sup> Nitric oxide and proinflammatory cytokines also elicit pain by working synergistically to potentiate one another's biosynthesis, as observed in the OR486 model.<sup>30</sup>

Here, we utilized a more clinically-relevant model of sustained COMT inhibition, characterized by enhanced sensitivity to noxious stimuli and altered pain-relevant cognitive-affective behaviors that persist over a 2-week period, to



determine the site-of-action whereby  $\beta$ ARs mediate persistent COMT-dependent pain. The contribution of peripheral adrenergic systems was first examined in adrenalectomized rats. We found that, compared to sham surgery rats, adrenalectomized rats lacking peripheral epinephrine fail to develop OR486-induced mechanical and thermal hypersensitivity. This finding is in line with those from previous studies showing that adrenalectomized rats have blunted hypersensitivity after formalin administration<sup>84</sup> or chronic constriction injury.<sup>85</sup> Together, these results suggest that peripherally circulating catecholamines contribute to the transmission of hypersensitivity in models of inflammatory and neuropathic pain, as well as chronic pain disorders. This conclusion is further supported by studies that have demonstrated increased urinary catecholamines in patients with myofascial pain<sup>10</sup> and increased circulating plasma catecholamines in women with fibromyalgia.<sup>9</sup> Of note, adrenalectomy also results in a reduction of circulating corticosterone levels.<sup>86,87</sup> Increased corticosterone levels after stress<sup>88</sup> or nerve injury<sup>89,90</sup> have been implicated in analgesia and pronociception. Thus, future experiments examining peripheral catecholamines should utilize adrenal medullectomized animals or should provide supplemental corticosterone to adrenalectomized animals to rule out corticosterone-mediated effects.

As previous preclinical and clinical studies have reported sex-specific differences in COMT-related phenotypes,<sup>91–95</sup> and as males and female rats exhibit different COMT expression patterns,<sup>96,97</sup> we examined the contribution of peripheral adrenergic systems to COMT-dependent pain in both sexes. Counter to our expectation, male and female rats exhibited a comparable increase in mechanical and thermal hypersensitivity after sustained systemic OR486 administration, which was blocked by suppressing peripheral adrenergic tone. Despite these findings, future studies and clinical applications related to COMT-dependent pain should continue to consider possible sex-specific effects.

The independent contribution of peripheral, spinal, and supraspinal  $\beta$ ARs to persistent COMT-dependent pain was next examined in separate groups of intact rats receiving targeted delivery of the nonselective  $\beta$ AR antagonist propranolol, the  $\beta_2$ AR antagonist ICI-118,551, or the  $\beta_3$ AR antagonist SR59230A alongside systemic OR486. We found that peripheral, but not spinal or supraspinal, administration of propranolol, ICI-118,511, or SR59230A blocked the development of OR486-induced hypersensitivity throughout the duration of the testing period. While all three antagonists blocked the development of mechanical hypersensitivity, only SR59230A blocked the development of thermal hypersensitivity. These findings significantly extend those from acute COMT inhibition studies,<sup>30,32</sup> demonstrating that peripheral  $\beta_2$ - and  $\beta_3$ ARs both contribute to the development of persistent mechanical hypersensitivity, while peripheral  $\beta_3$ ARs independently contribute to the development of persistent thermal hypersensitivity after sustained COMT inhibition.

The peripheral contribution of  $\beta_2$ ARs to pain is in line with results from previous studies demonstrating that epinephrine activates  $\beta_2$ ARs located on the peripheral terminals of primary afferent nociceptors, increasing their excitability and producing a hyperalgesic state.<sup>35–39</sup> Also, elevated plasma norepinephrine activates  $\beta_2$ ARs to promote visceral hypersensitivity.<sup>38</sup> In humans, variants of the  $\beta_2$ AR gene known to influence receptor expression are associated with increased risk of TMD.<sup>98</sup>

The contribution of peripheral  $\beta_3$ ARs to persistent pain is more novel. Peripherally expressed  $\beta_3$ ARs are known for their ability to regulate norepinephrine-induced changes in metabolism and thermoregulation.<sup>99</sup> In 2010, it was discovered that  $\beta_3$ ARs are expressed on primary afferent nociceptors, where they drive norepinephrine-induced ATP release and contribute to neuropathic pain.<sup>54</sup> Recently,  $\beta_3$ ARs have also been shown to mediate formalin-induced temporomandibular joint pain.<sup>100</sup> In contrast to acute COMT-dependent thermal hypersensitivity, which requires coincident activation of both  $\beta_2$ - and  $\beta_3$ ARs,<sup>32</sup> persistent COMT-dependent thermal hypersensitivity requires independent activation of peripheral  $\beta_3$ ARs. Unlike most G-protein-coupled receptors, including  $\beta_2$ ARs,  $\beta_3$ ARs do not undergo desensitization after agonist stimulation.<sup>101,102</sup> Thus,  $\beta_3$ ARs are uniquely positioned to stimulate downstream effectors for prolonged periods of time.

In addition to their location on primary afferent nociceptors,  $\beta_2$ - and  $\beta_3$ ARs are expressed in numerous peripheral cell types, in which they could potentially mediate pain, including immune cells involved in adaptive responses (T cells, mast cells, and macrophages), adipocytes, keratinocytes, and satellite glia. T cells, mast cells, and macrophages are immune cells in the periphery that express  $\beta$ ARs and, after their activation by epinephrine or norepinephrine, orchestrate inflammatory responses. Increased catecholamine levels after stress or pharmacologic manipulation led to activation of T cells, increased expression of  $\beta_2$ - and  $\beta_3$ ARs,<sup>49</sup> and production of interleukin-1, interleukin-6, and CCL2.<sup>103</sup> T-cell infiltration in the spinal dorsal horn of adult rats has been shown to contribute to hypersensitivity after nerve injury.<sup>104,105</sup> In line with these findings, patients with fibromyalgia have more activated T cells circulating in blood compared to healthy controls.<sup>106</sup> Epinephrine activates mast cells and stimulates the release of interleukin-1 $\beta$ , interleukin-6, and other proinflammatory cytokines in a  $\beta_2$ AR-dependent manner.<sup>46</sup> Increased activation of mast cells has been observed in numerous chronic pain disorders, including fibromyalgia, headache, vestibulodynia, and irritable bowel syndrome.<sup>107–112</sup> Agonist activation of  $\beta_2$ ARs expressed on macrophages *in vitro* results in activation of intracellular kinases and release of interleukin-6. Further, sustained systemic administration of epinephrine in mice results in  $\beta_2$ AR-mediated increases in macrophage activation and interleukin-6 production.<sup>47,48</sup>

Adipocytes are cells in the periphery that express both  $\beta_2$ - and  $\beta_3$ ARs and specialize in storing energy as fat.<sup>50</sup> They also interface with immune cells to regulate inflammatory responses.<sup>113</sup> Notably, adipocytes produce 30% of the interleukin-6 circulating in the body,<sup>114</sup> and studies have shown that activation of  $\beta_3$ ARs on adipocytes produces a robust increase in interleukin-6 levels in plasma,<sup>115</sup> as well as in tumor necrosis factor- $\alpha$ ,<sup>116</sup> CCL2,<sup>117</sup> and NO<sup>118</sup> levels *in vitro*.

Keratinocytes and satellite glial cells reside near the peripheral terminals and cell bodies, respectively, of primary afferent nociceptors. While a direct link between  $\beta$ AR activation on these cell types and pain has yet to be established, catecholamine-induced activation of keratinocyte  $\beta_2$ ARs results in increased intracellular kinase activation and interleukin-6 release.<sup>43–45</sup> Similarly, activation of satellite glia by catecholamines results in  $\beta$ AR-mediated increases in intracellular cyclic nucleotides that facilitate neuronal–glial communication.<sup>119</sup>

Collectively, these findings demonstrate the importance of  $\beta_2$ - and  $\beta_3$ ARs located on immunoregulatory cells in the periphery to persistent COMT-dependent pain, accounting for clinical observations that  $\beta$ AR antagonists provide pain relief for patients with functional pain disorders, such as fibromyalgia and TMD,<sup>33,34,120</sup> as well as inflammatory conditions, such as arthritis, rosacea, and CRPS.<sup>121–124</sup> While these findings seem inconsistent with the ability of antidepressants to alleviate persistent pain by increasing synaptic levels of catecholamines, it is important to note that the analgesic effect of antidepressants is associated with descending inhibition of pain *via* actions at  $\alpha_2$ ARs or D<sub>2</sub> dopamine receptors in the spinal dorsal horn.<sup>125,126</sup> Thus, catecholamines can exert divergent influences on nociception as a function of localization and net influence on neuronal excitability. Future studies are required to identify the specific cell type(s) in the periphery that express  $\beta$ ARs and, upon activation, release proinflammatory molecules that initiate persistent hypersensitivity. By determining where, when, and how  $\beta_2$ - and  $\beta_3$ ARs and their downstream effectors mediate COMT-dependent pain, the field will better understand the diverse nature of catecholamine signaling so that patients suffering from disorders resulting from reduced COMT and/or elevated catecholamines receive the most relevant treatments.

While the studies herein utilized a clinically-relevant rodent model of sustained COMT inhibition, additional mechanistic studies will implement a COMT<sup>-/-</sup> mouse model in order to more accurately represent the endogenously low levels of COMT activity observed in pain patients. Future studies are also necessary to elucidate the specific cell signaling pathways responsible for the initiation and maintenance of  $\beta_2$ - and  $\beta_3$ AR-mediated hypersensitivity. Finally, clinical studies are required to evaluate the efficacy of peripheral  $\beta_2$ - and  $\beta_3$ AR antagonist therapy in patients with chronic pain disorders and related conditions.

In conclusion, we utilized a clinically-relevant animal model that portrays the characteristics of patients with chronic

pain disorders to demonstrate that both male and female rats are susceptible to the development of persistent COMT-dependent pain, which is mediated *via* peripherally located  $\beta_2$ - and  $\beta_3$ ARs. These findings suggest that peripheral  $\beta_2$ - and  $\beta_3$ AR antagonist therapy may be an effective option for the treatment of chronic pain disorders, as well as those with overlapping peripheral  $\beta$ -adrenergic mechanisms (*e.g.*, CRPS<sup>127</sup>).

## Acknowledgments

The authors thank SAI Infusion Technologies, Libertyville, Illinois, for their assistance with catheter design.

This work was funded by R01 NS072205 to A.G.N. and P01 NS045685 to A.G.N. (National Institutes of Health [NIH]/National Institute of Neurological Disorders and Stroke, Bethesda, Maryland) as well as by the National Center for Advancing Translational Sciences, NIH, through Grant Award UL1TR001111.

## Competing Interests

The authors declare no competing interests.

## Correspondence

Address correspondence to Dr. Nackley: Center for Translational Pain Medicine, Department of Anesthesiology, Duke University School of Medicine, 905 South LaSalle Street, No. 1010, Durham, North Carolina 27710. andrea.nackley@duke.edu. Information on purchasing reprints may be found at [www.anesthesiology.org](http://www.anesthesiology.org) or on the masthead page at the beginning of this issue. ANESTHESIOLOGY's articles are made freely accessible to all readers, for personal use only, 6 months from the cover date of the issue.

## References

1. Clauw DJ: Fibromyalgia: A clinical review. *JAMA* 2014; 311:1547–55
2. Dzau VJ, Pizzo PA: Relieving pain in America: Insights from an Institute of Medicine committee. *JAMA* 2014; 312:1507–8
3. Rey E, Talley NJ: Irritable bowel syndrome: Novel views on the epidemiology and potential risk factors. *Dig Liver Dis* 2009; 41:772–80
4. Slade GD, Bair E, Greenspan JD, Dubner R, Fillingim RB, Diatchenko L, Maixner W, Knott C, Ohrbach R: Signs and symptoms of first-onset TMD and sociodemographic predictors of its development: The OPPERA prospective cohort study. *J Pain* 2013; 14(12 suppl):T20–32.e1–3
5. Tsang A, Von Korff M, Lee S, Alonso J, Karam E, Angermeyer MC, Borges GL, Bromet EJ, Demyttenaere K, de Girolamo G, de Graaf R, Gureje O, Lepine JP, Haro JM, Levinson D, Oakley Browne MA, Posada-Villa J, Seedat S, Watanabe M: Common chronic pain conditions in developed and developing countries: Gender and age differences and comorbidity with depression-anxiety disorders. *J Pain* 2008; 9:883–91
6. Wessellmann U, Bonham A, Foster D: Vulvodinia: Current state of the biological science. *Pain* 2014; 155:1696–701
7. Institute of Medicine (U.S.): Committee on Advancing Pain Research Care and Education.: *Relieving Pain in America: A Blueprint for Transforming Prevention, Care, Education, and Research*. Washington, DC, National Academies Press, 2011
8. Smith SB, Maixner DW, Greenspan JD, Dubner R, Fillingim RB, Ohrbach R, Knott C, Slade GD, Bair E, Gibson DG, Zaykin DV, Weir BS, Maixner W, Diatchenko L: Potential genetic risk factors for chronic TMD: Genetic associations

- from the OPPERA case control study. *J Pain* 2011; 12(11 suppl):T92–101
9. Torpy DJ, Papanicolaou DA, Lotsikas AJ, Wilder RL, Chrousos GP, Pillemer SR: Responses of the sympathetic nervous system and the hypothalamic-pituitary-adrenal axis to interleukin-6: A pilot study in fibromyalgia. *Arthritis Rheum* 2000; 43:872–80
  10. Evaskus DS, Laskin DM: A biochemical measure of stress in patients with myofascial pain-dysfunction syndrome. *J Dent Res* 1972; 51:1464–6
  11. Perry F, Heller PH, Kamiya J, Levine JD: Altered autonomic function in patients with arthritis or with chronic myofascial pain. *Pain* 1989; 39:77–84
  12. Marbach JJ, Levitt M: Erythrocyte catechol-O-methyltransferase activity in facial pain patients. *J Dent Res* 1976; 55:711
  13. Smith SB, Reenilä I, Männistö PT, Slade GD, Maixner W, Diatchenko L, Nackley AG: Epistasis between polymorphisms in COMT, ESRI, and GCH1 influences COMT enzyme activity and pain. *Pain* 2014; 155:2390–9
  14. Männistö PT, Kaakkola S: Catechol-O-methyltransferase (COMT): Biochemistry, molecular biology, pharmacology, and clinical efficacy of the new selective COMT inhibitors. *Pharmacol Rev* 1999; 51:593–628
  15. Capellino S, Cosentino M, Wolff C, Schmidt M, Grifka J, Straub RH: Catecholamine-producing cells in the synovial tissue during arthritis: Modulation of sympathetic neurotransmitters as new therapeutic target. *Ann Rheum Dis* 2010; 69:1853–60
  16. Flierl MA, Rittirsch D, Huber-Lang M, Sarma JV, Ward PA: Catecholamines—crafty weapons in the inflammatory arsenal of immune/inflammatory cells or opening pandora's box? *Mol Med* 2008; 14:195–204
  17. Harden RN, Rudin NJ, Bruehl S, Kee W, Parikh DK, Koeh J, Duc T, Gracely RH: Increased systemic catecholamines in complex regional pain syndrome and relationship to psychological factors: A pilot study. *Anesth Analg* 2004; 99:1478–85
  18. Lotta T, Vidgren J, Tilgmann C, Ulmanen I, Melén K, Julkunen I, Taskinen J: Kinetics of human soluble and membrane-bound catechol O-methyltransferase: A revised mechanism and description of the thermolabile variant of the enzyme. *Biochemistry* 1995; 34:4202–10
  19. Nackley AG, Shabalina SA, Tchivileva IE, Satterfield K, Korchynski O, Makarov SS, Maixner W, Diatchenko L: Human catechol-O-methyltransferase haplotypes modulate protein expression by altering mRNA secondary structure. *Science* 2006; 314:1930–3
  20. Barbosa FR, Matsuda JB, Mazucato M, de Castro França S, Zingaretti SM, da Silva LM, Martinez-Rossi NM, Júnior MF, Marins M, Fachin AL: Influence of catechol-O-methyltransferase (COMT) gene polymorphisms in pain sensibility of Brazilian fibromyalgia patients. *Rheumatol Int* 2012; 32:427–30
  21. Cohen H, Neumann L, Glazer Y, Ebsstein RP, Buskila D: The relationship between a common catechol-O-methyltransferase (COMT) polymorphism val(158) met and fibromyalgia. *Clin Exp Rheumatol* 2009; 27(5 suppl 56):S51–6
  22. Gürsoy S, Erdal E, Herken H, Madenci E, Alaşehirli B, Erdal N: Significance of catechol-O-methyltransferase gene polymorphism in fibromyalgia syndrome. *Rheumatol Int* 2003; 23:104–7
  23. Matsuda JB, Barbosa FR, Morel LJ, França Sde C, Zingaretti SM, da Silva LM, Pereira AM, Marins M, Fachin AL: Serotonin receptor (5-HT<sub>2A</sub>) and catechol-O-methyltransferase (COMT) gene polymorphisms: Triggers of fibromyalgia? *Rev Bras Reumatol* 2010; 50:141–9
  24. Vargas-Alarcón G, Fragoso JM, Cruz-Robles D, Vargas A, Vargas A, Lao-Villadóniga JI, García-Fructuosos F, Ramos-Kuri M, Hernández F, Springall R, Bojalil R, Vallejo M, Martínez-Lavín M: Catechol-O-methyltransferase gene haplotypes in Mexican and Spanish patients with fibromyalgia. *Arthritis Res Ther* 2007; 9:R110
  25. Diatchenko L, Slade GD, Nackley AG, Bhalang K, Sigurdsson A, Belfer I, Goldman D, Xu K, Shabalina SA, Shagin D, Max MB, Makarov SS, Maixner W: Genetic basis for individual variations in pain perception and the development of a chronic pain condition. *Hum Mol Genet* 2005; 14:135–43
  26. Zubieta JK, Heitzeg MM, Smith YR, Bueller JA, Xu K, Xu Y, Koeppel RA, Stohler CS, Goldman D: COMT val158met genotype affects mu-opioid neurotransmitter responses to a pain stressor. *Science* 2003; 299:1240–3
  27. Mobascher A, Brinkmeyer J, Thiele H, Toliat MR, Steffens M, Warbrick T, Musso F, Wittsack HJ, Saleh A, Schnitzler A, Winterer G: The val158met polymorphism of human catechol-O-methyltransferase (COMT) affects anterior cingulate cortex activation in response to painful laser stimulation. *Mol Pain* 2010; 6:32
  28. Rakvåg TT, Klepstad P, Baar C, Kvam TM, Dale O, Kaasa S, Krokan HE, Skorpen F: The Val158Met polymorphism of the human catechol-O-methyltransferase (COMT) gene may influence morphine requirements in cancer pain patients. *Pain* 2005; 116:73–8
  29. Desmeules J, Chabert J, Rebsamen M, Rapiti E, Piguet V, Besson M, Dayer P, Cedraschi C: Central pain sensitization, COMT Val158Met polymorphism, and emotional factors in fibromyalgia. *J Pain* 2014; 15:129–35
  30. Hartung JE, Cizek BP, Nackley AG:  $\beta$ 2- and  $\beta$ 3-adrenergic receptors drive COMT-dependent pain by increasing production of nitric oxide and cytokines. *Pain* 2014; 155:1346–55
  31. Kline RH, Exposto FG, O'Buckley SC, Westlund KN, Nackley AG: Catechol-O-methyltransferase inhibition alters pain and anxiety-related volitional behaviors through activation of beta-adrenergic receptors in the rat. *Neuroscience* 2015; 290:561–9
  32. Nackley AG, Tan KS, Fecho K, Flood P, Diatchenko L, Maixner W: Catechol-O-methyltransferase inhibition increases pain sensitivity through activation of both beta2- and beta3-adrenergic receptors. *Pain* 2007; 128:199–208
  33. Light KC, Bragdon EE, Grewen KM, Brownley KA, Girdler SS, Maixner W: Adrenergic dysregulation and pain with and without acute beta-blockade in women with fibromyalgia and temporomandibular disorder. *J Pain* 2009; 10:542–52
  34. Tchivileva IE, Lim PF, Smith SB, Slade GD, Diatchenko L, McLean SA, Maixner W: Effect of catechol-O-methyltransferase polymorphism on response to propranolol therapy in chronic musculoskeletal pain: A randomized, double-blind, placebo-controlled, crossover pilot study. *Pharmacogenet Genomics* 2010; 20:239–48
  35. Aley KO, Martin A, McMahon T, Mok J, Levine JD, Messing RO: Nociceptor sensitization by extracellular signal-regulated kinases. *J Neurosci* 2001; 21:6933–9
  36. Khasar SG, Lin YH, Martin A, Dadgar J, McMahon T, Wang D, Hundle B, Aley KO, Isenberg W, McCarter G, Green PG, Hodge CW, Levine JD, Messing RO: A novel nociceptor signaling pathway revealed in protein kinase C epsilon mutant mice. *Neuron* 1999; 24:253–60
  37. Khasar SG, McCarter G, Levine JD: Epinephrine produces a beta-adrenergic receptor-mediated mechanical hyperalgesia and *in vitro* sensitization of rat nociceptors. *J Neurophysiol* 1999; 81:1104–12
  38. Zhang C, Rui YY, Zhou YY, Ju Z, Zhang HH, Hu CY, Xiao Y, Xu GY: Adrenergic  $\beta$ 2-receptors mediates visceral hypersensitivity induced by heterotypic intermittent stress in rats. *PLoS One* 2014; 9:e94726
  39. Khasar SG, Green PG, Miao FJ, Levine JD: Vagal modulation of nociception is mediated by adrenomedullary epinephrine in the rat. *Eur J Neurosci* 2003; 17:909–15
  40. Hucho TB, Dina OA, Kuhn J, Levine JD: Estrogen controls PKCepsilon-dependent mechanical hyperalgesia through direct action on nociceptive neurons. *Eur J Neurosci* 2006; 24:527–34



41. Ochoa-Cortes F, Guerrero-Alba R, Valdez-Morales EE, Spreadbury I, Barajas-Lopez C, Castro M, Bertrand J, Cenac N, Vergnolle N, Vanner SJ: Chronic stress mediators act synergistically on colonic nociceptive mouse dorsal root ganglia neurons to increase excitability. *Neurogastroenterol Motil* 2014; 26:334–45
42. Wang S, Zhu HY, Jin Y, Zhou Y, Hu S, Liu T, Jiang X, Xu GY: Adrenergic signaling mediates mechanical hyperalgesia through activation of P2X3 receptors in primary sensory neurons of rats with chronic pancreatitis. *Am J Physiol Gastrointest Liver Physiol* 2015; 308:G710–9
43. Dasu MR, Ramirez SR, La TD, Gorouhi F, Nguyen C, Lin BR, Mashburn C, Stewart H, Peavy TR, Nolte JA, Isseroff RR: Crosstalk between adrenergic and toll-like receptors in human mesenchymal stem cells and keratinocytes: A recipe for impaired wound healing. *Stem Cells Transl Med* 2014; 3:745–59
44. Koizumi H, Tanaka H, Ohkawara A: beta-Adrenergic stimulation induces activation of protein kinase C and inositol 1,4,5-trisphosphate increase in epidermis. *Exp Dermatol* 1997; 6:128–32
45. Pullar CE, Isseroff RR: The beta 2-adrenergic receptor activates pro-migratory and pro-proliferative pathways in dermal fibroblasts *via* divergent mechanisms. *J Cell Sci* 2006; 119(Pt 3):592–602
46. Chi DS, Fitzgerald SM, Pitts S, Cantor K, King E, Lee SA, Huang SK, Krishnaswamy G: MAPK-dependent regulation of IL-1 and beta-adrenoreceptor-induced inflammatory cytokine production from mast cells: Implications for the stress response. *BMC Immunol* 2004; 5:22
47. Chiarella SE, Soberanes S, Urich D, Morales-Nebreda L, Nigdelioglu R, Green D, Young JB, Gonzalez A, Rosario C, Misharin AV, Ghio AJ, Wunderink RG, Donnelly HK, Radigan KA, Perlman H, Chandel NS, Budinger GR, Mutlu GM:  $\beta_2$ -Adrenergic agonists augment air pollution-induced IL-6 release and thrombosis. *J Clin Invest* 2014; 124:2935–46
48. Kim MH, Gorouhi F, Ramirez S, Granick JL, Byrne BA, Soulika AM, Simon SI, Isseroff RR: Catecholamine stress alters neutrophil trafficking and impairs wound healing by  $\beta_2$ -adrenergic receptor-mediated upregulation of IL-6. *J Invest Dermatol* 2014; 134:809–17
49. Laukova M, Vargovic P, Csaderova L, Chovanova L, Vlcek M, Imrich R, Krizanova O, Kvetnansky R: Acute stress differentially modulates  $\beta_1$ ,  $\beta_2$  and  $\beta_3$  adrenoceptors in T cells, but not in B cells, from the rat spleen. *Neuroimmunomodulation* 2012; 19:69–78
50. Collins S, Surwit RS: The beta-adrenergic receptors and the control of adipose tissue metabolism and thermogenesis. *Recent Prog Horm Res* 2001; 56:309–28
51. Rainbow TC, Parsons B, Wolfe BB: Quantitative autoradiography of beta 1- and beta 2-adrenergic receptors in rat brain. *Proc Natl Acad Sci U S A* 1984; 81:1585–9
52. Nicholson R, Dixon AK, Spanswick D, Lee K: Noradrenergic receptor mRNA expression in adult rat superficial dorsal horn and dorsal root ganglion neurons. *Neurosci Lett* 2005; 380:316–21
53. Stone EA, Ariano MA: Are glial cells targets of the central noradrenergic system? A review of the evidence. *Brain Res Brain Res Rev* 1989; 14:297–309
54. Kanno T, Yaguchi T, Nishizaki T: Noradrenaline stimulates ATP release from DRG neurons by targeting beta(3) adrenoceptors as a factor of neuropathic pain. *J Cell Physiol* 2010; 224:345–51
55. Claustre Y, Leonetti M, Santucci V, Bougault I, Desvignes C, Rouquier L, Aubin N, Keane P, Busch S, Chen Y, Palejwala V, Tocci M, Yamdagni P, Didier M, Avenet P, Le Fur G, Oury-Donat F, Scatton B, Steinberg R: Effects of the beta3-adrenoceptor (A $\beta$ 3) agonist SR58611A (amibegron) on serotonergic and noradrenergic transmission in the rodent: Relevance to its antidepressant/anti-anxiolytic-like profile. *Neuroscience* 2008; 156:353–64
56. Berge OG: Predictive validity of behavioural animal models for chronic pain. *Br J Pharmacol* 2011; 164:1195–206
57. Ren K, Dubner R: Inflammatory models of pain and hyperalgesia. *ILAR J* 1999; 40:111–8
58. Kim KJ, Yoon YW, Chung JM: Comparison of three rodent neuropathic pain models. *Exp Brain Res* 1997; 113:200–6
59. Martin LJ, Hathaway G, Isbester K, Mirali S, Acland EL, Niederstrasser N, Slepian PM, Trost Z, Bartz JA, Sapolsky RM, Sternberg WF, Levitin DJ, Mogil JS: Reducing social stress elicits emotional contagion of pain in mouse and human strangers. *Curr Biol* 2015; 25:326–32
60. Lariviere WR, Mogil JS: The genetics of pain and analgesia in laboratory animals. *Methods Mol Biol* 2010; 617:261–78
61. Haddad F, Adams GR: Inhibition of MAP/ERK kinase prevents IGF-I-induced hypertrophy in rat muscles. *J Appl Physiol* (1985) 2004; 96:203–10
62. Yaksh TL, Rudy TA: Chronic catheterization of the spinal subarachnoid space. *Physiol Behav* 1976; 17:1031–6
63. DeVos SL, Miller TM: Direct intraventricular delivery of drugs to the rodent central nervous system. *J Vis Exp* 2013; e50326
64. Chaplan SR, Bach FW, Pogrel JW, Chung JM, Yaksh TL: Quantitative assessment of tactile allodynia in the rat paw. *J Neurosci Methods* 1994; 53:55–63
65. Hargreaves K, Dubner R, Brown F, Flores C, Joris J: A new and sensitive method for measuring thermal nociception in cutaneous hyperalgesia. *Pain* 1988; 32:77–88
66. Dumka VK, Tandan SK, Raviprakash V, Tripathi HC: Central noradrenergic and cholinergic modulation of formaldehyde-induced pedal inflammation and nociception in rats. *Indian J Physiol Pharmacol* 1996; 40:41–6
67. Fukui M, Nakagawa T, Minami M, Satoh M: Involvement of beta2-adrenergic and mu-opioid receptors in antinociception produced by intracerebroventricular administration of alpha,beta-methylene-ATP. *Jpn J Pharmacol* 2001; 86:423–8
68. Kanzler SA, Januario AC, Paschoalini MA: Involvement of  $\beta_3$ -adrenergic receptors in the control of food intake in rats. *Braz J Med Biol Res* 2011; 44:1141–7
69. Kubota E, Kubota T, Matsumoto J, Shibata T, Murakami KI: Synovial fluid cytokines and proteinases as markers of temporomandibular joint disease. *J Oral Maxillofac Surg* 1998; 56:192–8
70. Uzar E, Evliyaoglu O, Yucel Y, Ugur Cevik M, Acar A, Guzel I, Islamoglu Y, Colpan L, Tasdemir N: Serum cytokine and pro-brain natriuretic peptide (BNP) levels in patients with migraine. *Eur Rev Med Pharmacol Sci* 2011; 15:1111–6
71. Sarchielli P, Alberti A, Baldi A, Coppola F, Rossi C, Pierguidi L, Floridi A, Calabresi P: Proinflammatory cytokines, adhesion molecules, and lymphocyte integrin expression in the internal jugular blood of migraine patients without aura assessed ictally. *Headache* 2006; 46:200–7
72. Slade GD, Conrad MS, Diatchenko L, Rashid NU, Zhong S, Smith S, Rhodes J, Medvedev A, Makarov S, Maixner W, Nackley AG: Cytokine biomarkers and chronic pain: Association of genes, transcription, and circulating proteins with temporomandibular disorders and widespread palpation tenderness. *Pain* 2011; 152:2802–12
73. Omote K, Hazama K, Kawamata T, Kawamata M, Nakayaka Y, Toriyabe M, Namiki A: Peripherally nitric oxide in carrageenan-induced inflammation. *Brain Res* 2001; 912:171–5
74. Holguin A, O'Connor KA, Biedenkapp J, Campisi J, Wieseler-Frank J, Milligan ED, Hansen MK, Spataro L, Maksimova E, Bravmann C, Martin D, Fleshner M, Maier SF, Watkins LR: HIV-1 gp120 stimulates proinflammatory cytokine-mediated pain facilitation *via* activation of nitric oxide synthase-I (nNOS). *Pain* 2004; 110:517–30
75. Kuboyama K, Tsuda M, Tsutsui M, Toyohara Y, Tozaki-Saitoh H, Shimokawa H, Yanagihara N, Inoue K: Reduced spinal

- microglial activation and neuropathic pain after nerve injury in mice lacking all three nitric oxide synthases. *Mol Pain* 2011; 7:50
76. Boehning D, Snyder SH: Novel neural modulators. *Annu Rev Neurosci* 2003; 26:105–31
  77. Aley KO, McCarter G, Levine JD: Nitric oxide signaling in pain and nociceptor sensitization in the rat. *J Neurosci* 1998; 18:7008–14
  78. Czeschik JC, Hagenacker T, Schäfers M, Büsselberg D: TNF- $\alpha$  differentially modulates ion channels of nociceptive neurons. *Neurosci Lett* 2008; 434:293–8
  79. Binshtok AM, Wang H, Zimmermann K, Amaya F, Vardeh D, Shi L, Brenner GJ, Ji RR, Bean BP, Woolf CJ, Samad TA: Nociceptors are interleukin-1 $\beta$  sensors. *J Neurosci* 2008; 28:14062–73
  80. Obreja O, Biasio W, Andratsch M, Lips KS, Rathee PK, Ludwig A, Rose-John S, Kress M: Fast modulation of heat-activated ionic current by proinflammatory interleukin 6 in rat sensory neurons. *Brain* 2005; 128(Pt 7):1634–41
  81. Obreja O, Rathee PK, Lips KS, Distler C, Kress M: IL-1  $\beta$  potentiates heat-activated currents in rat sensory neurons: Involvement of IL-1RI, tyrosine kinase, and protein kinase C. *FASEB J* 2002; 16:1497–503
  82. Jung H, Toth PT, White FA, Miller RJ: Monocyte chemoattractant protein-1 functions as a neuromodulator in dorsal root ganglia neurons. *J Neurochem* 2008; 104:254–63
  83. Sun JH, Yang B, Donnelly DF, Ma C, LaMotte RH: MCP-1 enhances excitability of nociceptive neurons in chronically compressed dorsal root ganglia. *J Neurophysiol* 2006; 96:2189–99
  84. Vissers KC, De Jongh RF, Crul BJ, Vinken P, Meert TF: Adrenalectomy affects pain behavior of rats after formalin injection. *Life Sci* 2004; 74:1243–51
  85. Wang S, Lim G, Zeng Q, Sung B, Ai Y, Guo G, Yang L, Mao J: Expression of central glucocorticoid receptors after peripheral nerve injury contributes to neuropathic pain behaviors in rats. *J Neurosci* 2004; 24:8595–605
  86. Marinelli M, Piazza PV, Deroche V, Maccari S, Le Moal M, Simon H: Corticosterone circadian secretion differentially facilitates dopamine-mediated psychomotor effect of cocaine and morphine. *J Neurosci* 1994; 14(5 Pt 1):2724–31
  87. Taylor BK, Akana SF, Peterson MA, Dallman MF, Basbaum AI: Pituitary-adrenocortical responses to persistent noxious stimuli in the awake rat: Endogenous corticosterone does not reduce nociception in the formalin test. *Endocrinology* 1998; 139:2407–13
  88. Sorge RE, Martin LJ, Isbester KA, Sotocinal SG, Rosen S, Tuttle AH, Wieskopf JS, Acland EL, Dokova A, Kadoura B, Leger P, Mapplebeck JC, McPhail M, Delaney A, Wigerblad G, Schumann AP, Quinn T, Frasnelli J, Svensson CI, Sternberg WF, Mogil JS: Olfactory exposure to males, including men, causes stress and related analgesia in rodents. *Nat Methods* 2014; 11:629–32
  89. Wang S, Lim G, Zeng Q, Sung B, Yang L, Mao J: Central glucocorticoid receptors modulate the expression and function of spinal NMDA receptors after peripheral nerve injury. *J Neurosci* 2005; 25:488–95
  90. Wang S, Lim G, Yang L, Sung B, Mao J: Downregulation of spinal glutamate transporter EAAC1 following nerve injury is regulated by central glucocorticoid receptors in rats. *Pain* 2006; 120:78–85
  91. Gogos JA, Morgan M, Luine V, Santha M, Ogawa S, Pfaff D, Karayiorgou M: Catechol-O-methyltransferase-deficient mice exhibit sexually dimorphic changes in catecholamine levels and behavior. *Proc Natl Acad Sci U S A* 1998; 95:9991–6
  92. Papaleo F, Crawley JN, Song J, Lipska BK, Pickel J, Weinberger DR, Chen J: Genetic dissection of the role of catechol-O-methyltransferase in cognition and stress reactivity in mice. *J Neurosci* 2008; 28:8709–23
  93. Harrison PJ, Tunbridge EM: Catechol-O-methyltransferase (COMT): a gene contributing to sex differences in brain function, and to sexual dimorphism in the predisposition to psychiatric disorders. *Neuropsychopharmacology* 2008; 33:3037–45
  94. White TP, Loth E, Rubia K, Krabbendam L, Whelan R, Banaschewski T, Barker GJ, Bokde AL, Büchel C, Conrod P, Fauth-Bühler M, Flor H, Frouin V, Gallinat J, Garavan H, Gowland P, Heinz A, Ittermann B, Lawrence C, Mann K, Paillère ML, Nees F, Paus T, Pausova Z, Rietschel M, Robbins T, Smolka MN, Shergill SS, Schumann G; IMAGEN Consortium: Sex differences in COMT polymorphism effects on prefrontal inhibitory control in adolescence. *Neuropsychopharmacology* 2014; 39:2560–9
  95. Belfer I, Segall SK, Lariviere WR, Smith SB, Dai F, Slade GD, Rashid NU, Mogil JS, Campbell CM, Edwards RR, Liu Q, Bair E, Maixner W, Diatchenko L: Pain modality- and sex-specific effects of COMT genetic functional variants. *Pain* 2013; 154:1368–76
  96. Boudíková B, Szumlanski C, Maidak B, Weinshilboum R: Human liver catechol-O-methyltransferase pharmacogenetics. *Clin Pharmacol Ther* 1990; 48:381–9
  97. Chen LX, Fang Q, Chen Q, Guo J, Wang ZZ, Chen Y, Wang R: Study *in vitro* and *in vivo* of nociceptin/orphanin FQ(1–13)NH<sub>2</sub> analogues substituting N-Me-Gly for Gly2 or Gly3. *Peptides* 2004; 25:1349–54
  98. Diatchenko L, Anderson AD, Slade GD, Fillingim RB, Shabalina SA, Higgins TJ, Sama S, Belfer I, Goldman D, Max MB, Weir BS, Maixner W: Three major haplotypes of the beta2 adrenergic receptor define psychological profile, blood pressure, and the risk for development of a common musculoskeletal pain disorder. *Am J Med Genet B Neuropsychiatr Genet* 2006; 141B:449–62
  99. Strosberg AD: Structure and function of the beta 3-adrenergic receptor. *Annu Rev Pharmacol Toxicol* 1997; 37:421–50
  100. Fávoro-Moreira NC, Parada CA, Tambeli CH: Blockade of  $\beta_1$ -,  $\beta_2$ - and  $\beta_3$ -adrenoceptors in the temporomandibular joint induces antinociception especially in female rats. *Eur J Pain* 2012; 16:1302–10
  101. Liggett SB, Freedman NJ, Schwinn DA, Lefkowitz RJ: Structural basis for receptor subtype-specific regulation revealed by a chimeric beta 3/beta 2-adrenergic receptor. *Proc Natl Acad Sci U S A* 1993; 90:3665–9
  102. Cao W, Luttrell LM, Medvedev AV, Pierce KL, Daniel KW, Dixon TM, Lefkowitz RJ, Collins S: Direct binding of activated c-Src to the beta 3-adrenergic receptor is required for MAP kinase activation. *J Biol Chem* 2000; 275:38131–4
  103. Slota C, Shi A, Chen G, Bevans M, Weng NP: Norepinephrine preferentially modulates memory CD8 T cell function inducing inflammatory cytokine production and reducing proliferation in response to activation. *Brain Behav Immun* 2015; 46:168–79
  104. Costigan M, Moss A, Latremoliere A, Johnston C, Verma-Gandhu M, Herbert TA, Barrett L, Brenner GJ, Vardeh D, Woolf CJ, Fitzgerald M: T-cell infiltration and signaling in the adult dorsal spinal cord is a major contributor to neuropathic pain-like hypersensitivity. *J Neurosci* 2009; 29:14415–22
  105. Vicuña L, Stochlic DE, Latremoliere A, Bali KK, Simonetti M, Husaini D, Prokosch S, Riva P, Griffin RS, Njoo C, Gehrig S, Mall MA, Arnold B, Devor M, Woolf CJ, Liberles SD, Costigan M, Kuner R: The serine protease inhibitor SerpinA3N attenuates neuropathic pain by inhibiting T cell-derived leukocyte elastase. *Nat Med* 2015; 21:518–23
  106. Russell IJ, Vipraio GA, Michalek JE, Craig FE, Kang YK, Richards AB: Lymphocyte markers and natural killer cell activity in fibromyalgia syndrome: Effects of low-dose, sublingual use of human interferon-alpha. *J Interferon Cytokine Res* 1999; 19:969–78

107. Feng B, La JH, Schwartz ES, Gebhart GF: Irritable bowel syndrome: Methods, mechanisms, and pathophysiology. Neural and neuro-immune mechanisms of visceral hypersensitivity in irritable bowel syndrome. *Am J Physiol Gastrointest Liver Physiol* 2012; 302:G1085–98
108. Graziottin A, Skaper SD, Fusco M: Mast cells in chronic inflammation, pelvic pain and depression in women. *Gynecol Endocrinol* 2014; 30:472–7
109. Levy D: Migraine pain, meningeal inflammation, and mast cells. *Curr Pain Headache Rep* 2009; 13:237–40
110. Petra AI, Panagiotidou S, Stewart JM, Conti P, Theoharides TC: Spectrum of mast cell activation disorders. *Expert Rev Clin Immunol* 2014; 10:729–39
111. Regauer S, Eberz B, Beham-Schmid C: Mast cell infiltrates in vulvodynia represent secondary and idiopathic mast cell hyperplasias. *APMIS* 2015; 123:452–6
112. Zhang Z, Cherryholmes G, Mao A, Marek C, Longmate J, Kalos M, Amand RP, Shively JE: High plasma levels of MCP-1 and eotaxin provide evidence for an immunological basis of fibromyalgia. *Exp Biol Med (Maywood)* 2008; 233:1171–80
113. Vieira-Potter VJ: Inflammation and macrophage modulation in adipose tissues. *Cell Microbiol* 2014; 16:1484–92
114. Mohamed-Ali V, Goodrick S, Rawesh A, Katz DR, Miles JM, Yudkin JS, Klein S, Coppel SW: Subcutaneous adipose tissue releases interleukin-6, but not tumor necrosis factor- $\alpha$ , *in vivo*. *J Clin Endocrinol Metab* 1997; 82:4196–200
115. Mohamed-Ali V, Flower L, Sethi J, Hotamisligil G, Gray R, Humphries SE, York DA, Pinkney J: beta-Adrenergic regulation of IL-6 release from adipose tissue: *In vivo* and *in vitro* studies. *J Clin Endocrinol Metab* 2001; 86:5864–9
116. Fu L, Isobe K, Zeng Q, Suzukawa K, Takekoshi K, Kawakami Y: beta-adrenoceptor agonists downregulate adiponectin, but upregulate adiponectin receptor 2 and tumor necrosis factor- $\alpha$  expression in adipocytes. *Eur J Pharmacol* 2007; 569:155–62
117. Kralisch S, Klein J, Lossner U, Bluher M, Paschke R, Stumvoll M, Fasshauer M: Isoproterenol stimulates monocyte chemoattractant protein-1 expression and secretion in 3T3-L1 adipocytes. *Regul Pept* 2006; 135:12–6
118. Canová NK, Lincová D, Kmoníčková E, Kameníková L, Farghali H: Nitric oxide production from rat adipocytes is modulated by beta3-adrenergic receptor agonists and is involved in a cyclic AMP-dependent lipolysis in adipocytes. *Nitric Oxide* 2006; 14:200–11
119. Gilman AG, Nirenberg M: Effect of catecholamines on the adenosine 3':5'-cyclic monophosphate concentrations of clonal satellite cells of neurons. *Proc Natl Acad Sci U S A* 1971; 68:2165–8
120. Wood PB, Kablinger AS, Caldito GS: Open trial of pindolol in the treatment of fibromyalgia. *Ann Pharmacother* 2005; 39:1812–6
121. Rodrigues WF, Madeira MF, da Silva TA, Clemente-Napimoga JT, Miguel CB, Dias-da-Silva VJ, Barbosa-Neto O, Lopes AH, Napimoga MH: Low dose of propranolol down-modulates bone resorption by inhibiting inflammation and osteoclast differentiation. *Br J Pharmacol* 2012; 165:2140–51
122. Park JM, Mun JH, Song M, Kim HS, Kim BS, Kim MB, Ko HC: Propranolol, doxycycline and combination therapy for the treatment of rosacea. *J Dermatol* 2015; 42:64–9
123. Kaplan R, Robinson CA, Scavulli JF, Vaughan JH: Propranolol and the treatment of rheumatoid arthritis. *Arthritis Rheum* 1980; 23:253–5
124. Hogan CJ, Hurwitz SR: Treatment of complex regional pain syndrome of the lower extremity. *J Am Acad Orthop Surg* 2002; 10:281–9
125. Millan MJ: Descending control of pain. *Prog Neurobiol* 2002; 66:355–474
126. Sánchez C, Hyttel J: Comparison of the effects of antidepressants and their metabolites on reuptake of biogenic amines and on receptor binding. *Cell Mol Neurobiol* 1999; 19:467–89
127. Li W, Shi X, Wang L, Guo T, Wei T, Cheng K, Rice KC, Kingery WS, Clark JD: Epidermal adrenergic signaling contributes to inflammation and pain sensitization in a rat model of complex regional pain syndrome. *Pain* 2013; 154:1224–36
